# Supplementary material for: Functional Characterization of the Almstn2 Gene and Its Association with Growth Traits in the Yellowfin Seabream Acanthopagrus latus (Hottuyn, 1782)
Source: MDPI journal article supplement (doi:10.3390/genes14122142), 2023-11-27
Supplement: s1 [file s1]

## Supplementary Table

**Table S1.** mstn2a proteins used in multiple alignment.

| Species                       | Protein name | Total AA identity % |
|-------------------------------|--------------|---------------------|
| <i>Acanthopagrus latus</i>    | mstn2b       | 100                 |
| <i>Acanthopagrus latus</i>    | mstn2a       | 99.8                |
| <i>Sparus aurata</i>          | mstn2        | 98.3                |
| <i>Lepisosteus oculatus</i>   | mstn2        | 96.4                |
| <i>Larimichthys crocea</i>    | mstn2        | 96.4                |
| <i>Oreochromis niloticus</i>  | mstn2        | 95.4                |
| <i>Tetraodon nigroviridis</i> | mstn2        | 93.6                |
| <i>Xiphophorus maculatus</i>  | mstn2        | 86.6                |
| <i>Gasterosteus aculeatus</i> | mstn2        | 82.2                |
| <i>Hippocampus comes</i>      | mstn2        | 81.0                |
| <i>Cynoglossus semilaevis</i> | mstn2        | 80.5                |
| <i>Chrysemys picta bellii</i> | mstn         | 80.5                |
| <i>Danio rerio</i>            | mstn2        | 62.5                |
| <i>Homo sapiens</i>           | mstn2        | 61.8                |
| <i>Mus musculus</i>           | mstn2        | 61.3                |
| <i>Gallus gallus</i>          | mstn2        | 59.4                |

**Table S2.** Lengths of exons (bp) and introns (bp) of each mstn2 gene.

| Species                           | E1  | I1   | E2   | I2   | E3  | I3   | E4  |
|-----------------------------------|-----|------|------|------|-----|------|-----|
| <i>Acanthopagrus latus mstn2a</i> | 328 | 969  | 371  | 323  | 381 | -    | -   |
| <i>Acanthopagrus latus mstn2b</i> | 328 | 956  | 371  | 323  | 381 | -    | -   |
| <i>Sparus aurata</i>              | 328 | 940  | 371  | 341  | 381 | -    | -   |
| <i>Larimichthys crocea</i>        | 328 | 877  | 371  | 435  | 381 | -    | -   |
| <i>Gasterosteus aculeatus</i>     | 271 | 21   | 42   | 195  | 359 | 120  | 381 |
| <i>Tetraodon nigroviridis</i>     | 325 | 642  | 374  | 69   | 381 | -    | -   |
| <i>Xiphophorus maculatus</i>      | 331 | 829  | 371  | 932  | 381 | -    | -   |
| <i>Oreochromis niloticus</i>      | 340 | 849  | 368  | 264  | 381 | -    | -   |
| <i>Cynoglossus semilaevis</i>     | 280 | 693  | 371  | 253  | 381 | -    | -   |
| <i>Hippocampus comes</i>          | 76  | 4659 | 243  | 2003 | 365 | 1594 | 381 |
| <i>Lepisosteus oculatus</i>       | 373 | 1209 | 1074 | 381  | 371 | -    | -   |
| <i>Danio rerio</i>                | 361 | 1202 | 2201 | 369  | 371 | -    | -   |
| <i>Chrysemys picta bellii</i>     | 373 | 2656 | 3133 | 381  | 374 | -    | -   |
| <i>Gallus gallus</i>              | 373 | 2091 | 2274 | 381  | 374 | -    | -   |
| <i>Homo sapiens</i>               | 374 | 1788 | 2423 | 381  | 374 | -    | -   |
| <i>Mus musculus</i>               | 376 | 1741 | 1994 | 381  | 374 | -    | -   |

**Table S3.** Mstn1 and mstn2 proteins used in this study.

| Species                       | Abbreviation | Protein name | No.                  | Protein name | No.                  |
|-------------------------------|--------------|--------------|----------------------|--------------|----------------------|
| <i>Acanthopagrus latus</i>    | Ala          | mstn1        | OR735568             | mstn2a       | OR735569             |
|                               |              |              |                      | mstn2b       | OR735570             |
| <i>Sparus aurata</i>          | Sau          | mstn1        | ENSSAUT00010010370.1 | mstn2        | ENSSAUT00010053325.1 |
| <i>Larimichthys crocea</i>    | Lcr          | mstn1        | ENSLCRT00005045592.1 | mstn2        | ENSLCRT00005044672.1 |
| <i>Oreochromis niloticus</i>  | Oni          | mstn1        | ENSONIT00000048569.1 | mstn2        | ENSONIT00000015370.2 |
| <i>Cynoglossus semilaevis</i> | Cse          | mstn1        | XP_008327219.1       | mstn2        | ENSCSET00000008642.1 |
| <i>Gasterosteus aculeatus</i> | Gac          | mstn1        | ENSSAUT00010010370.1 | mstn2        | ENSGACT00000020597.1 |
| <i>Xiphophorus maculatus</i>  | Xma          | mstn1        | ---                  | mstn2        | ENSXMAT00000021209.1 |
| <i>Tetraodon nigroviridis</i> | Tni          | mstn1        | ENSTNIT00000019017.1 | mstn2        | ENSTNIT00000020527.1 |
| <i>Hippocampus comes</i>      | Hco          | mstn1        | ENSHCOT00000004812.1 | mstn2        | ENSHCOT00000001635.1 |
| <i>Lepisosteus oculatus</i>   | Loc          | mstn1        | ENSLOCT00000010751.1 | mstn2        | ---                  |
| <i>Danio rerio</i>            | Dre          | mstn1        | ENSDART00000100386.2 | mstn2        | ENSDART00000063055.5 |
| <i>Chrysemys picta bellii</i> | Xtr          | mstn         | ENSCPBT00000034185.1 | mstn2        | ---                  |
| <i>Gallus gallus</i>          | Gga          | mstn         | ENSGALT00010030820.1 | mstn2        | ---                  |
| <i>Homo sapiens</i>           | Hsa          | mstn         | ENST00000260950.5    | mstn2        | ---                  |
| <i>Mus musculus</i>           | Msu          | mstn         | ENSMUST00000027269.7 | mstn2        | ---                  |
